# Supplementary material for: Theoretical and experimental solid state studies of Ethyl 1-benzyl-2-(thiophen-3-yl)-1H-benzo[d]imidazole-5-carboxylate
Source: publisher site journal article supplement (doi:10.1515/zkri-2020-0052), 2020-09-17
Supplement: Supplementary file 1 [file j_zkri-2020-0052_suppl.docx]

**Theoretical and experimental solid state studies of Ethyl 1-benzyl-2-(thiophen-3-yl)-1H-benzo[d]imidazole-5-carboxylate**

Madan Kumar S.,1* Vasantha Kumar,2,3 Mohammed Al-Ghorbani,4,5 Shivaram Holla B,2 Boja Poojary,3 Praveen P,6 Chandra Nayak S.,7 Jnani S. Mohan,8 Thamotharan S.,8 Shamprasad V. R.,9 Lokanath N. K.10 Nabil Al-Zaqri,11 Ali Alsalme,11

1IOE, Vijnana Bhavan, University of Mysore, Mysore, India 57006

2 Department of Chemistry, SDM College (Autonomous), Ujire, India 574 240

3Department of Chemistry, Mangalore University, Mangalagangothri, India 574199

4Department of Chemistry, Ulla Science and Arts College, Taibah University, Kingdom of Saudi Arabia

5Department of Chemistry, University of Thamar, Yemen

6Department of Materials Science, Mangalore University, Mangalagangothri, India 574199

7Department of Studies in Biotechnology, University of Mysore, Mysore, India 57006

8Biomolecular Crystallography Laboratory, Department of Bioinformatics, School of Chemical and Biotechnology,SASTRA Deemed University, Thanjavur 613 401

9Neurogenetics lab, Dept of Applied Zoology, Mangalore University, Mangalagangothri, India 574199

10 Department of Studies in Physics, University of Mysore, Mysore 570006

11Department of Chemistry, College of Science, King Saud University, P. O. Box 2455, Riyadh 11451, Saudi Arabia

*Correspondence author: madan.mx@gmail.com;

**S1: Table Dihedral angles of the molecules A and B.**

| Ring (Centroid) | Ring (Centroid) | Angle (0) |
| --- | --- | --- |
| **A** | | |
| S1A/C1A-C4A (Cg1) | C7A-C12A (Cg3) | 69.9(2) |
| S1A/C1A-C4A (Cg1) | N1A/C5A/N2A/C13A-C18A (Cg5) | 28.70(17) |
| C7A-C12A (Cg3) | N1A/C5A/N2A/C13A-C18A (Cg5) | 78.63(17) |
| **B** | | |
| S1B/C1B-C4B (Cg6) | C7B-C12B (Cg8) | 70.2(2) |
| S1B/C1B-C4B (Cg6) | N1B/C5B/N2B/C13B-C18B (Cg10) | 28.57(17) |
| C7B-C12B (Cg8) | N1B/C5B/N2B/C13B-C18B (Cg10) | 78.09(18) |

**Table S2**: (a) Interaction energies (kJ/mole) of the molecular pairs calculated from energy framework calculation of **BI: Molecule A, molecule B** and Overall energy profiles. (b) Interaction energies listed. Scale factors for benchmarked energy models (See Ref. 32).

**Molecule A energy profile Molecule B energy profile**
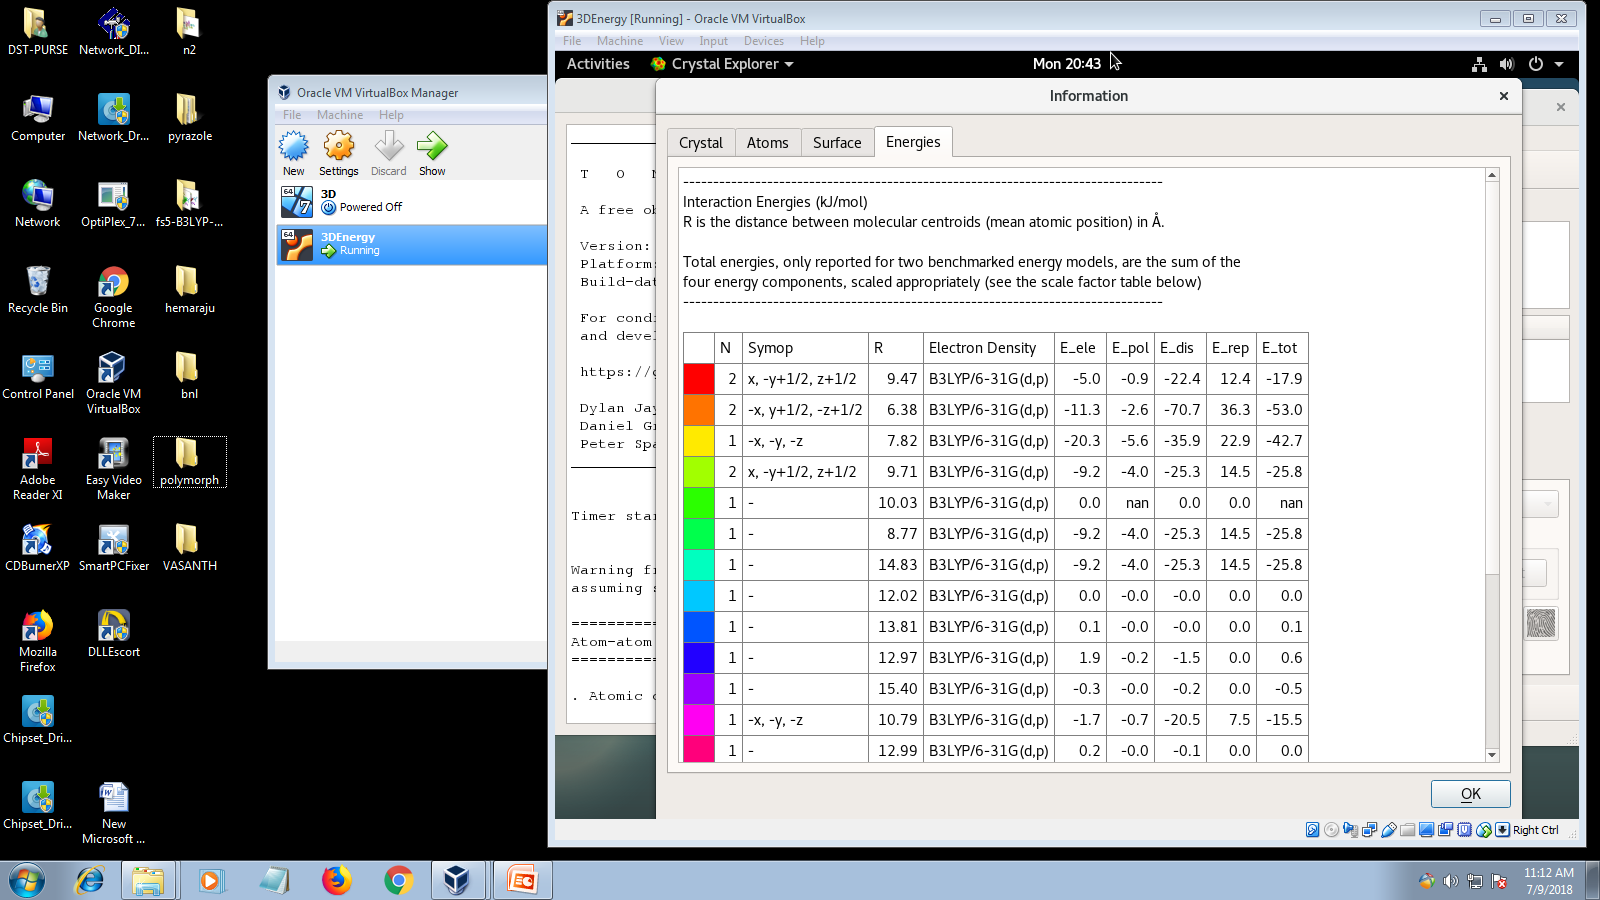

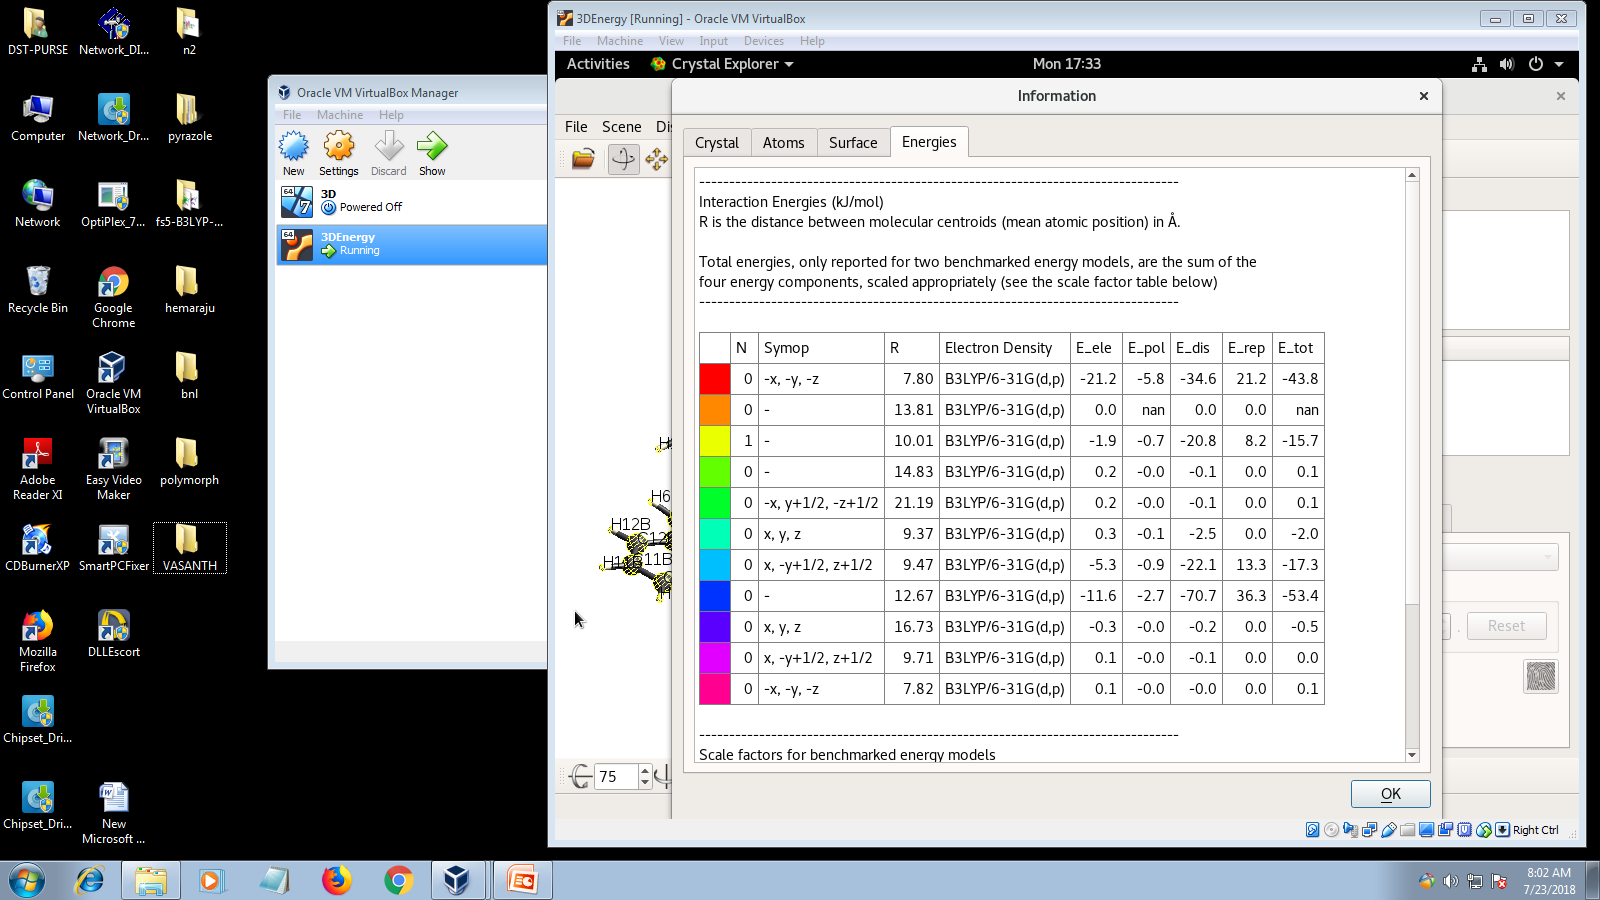


**Overall energy profile**


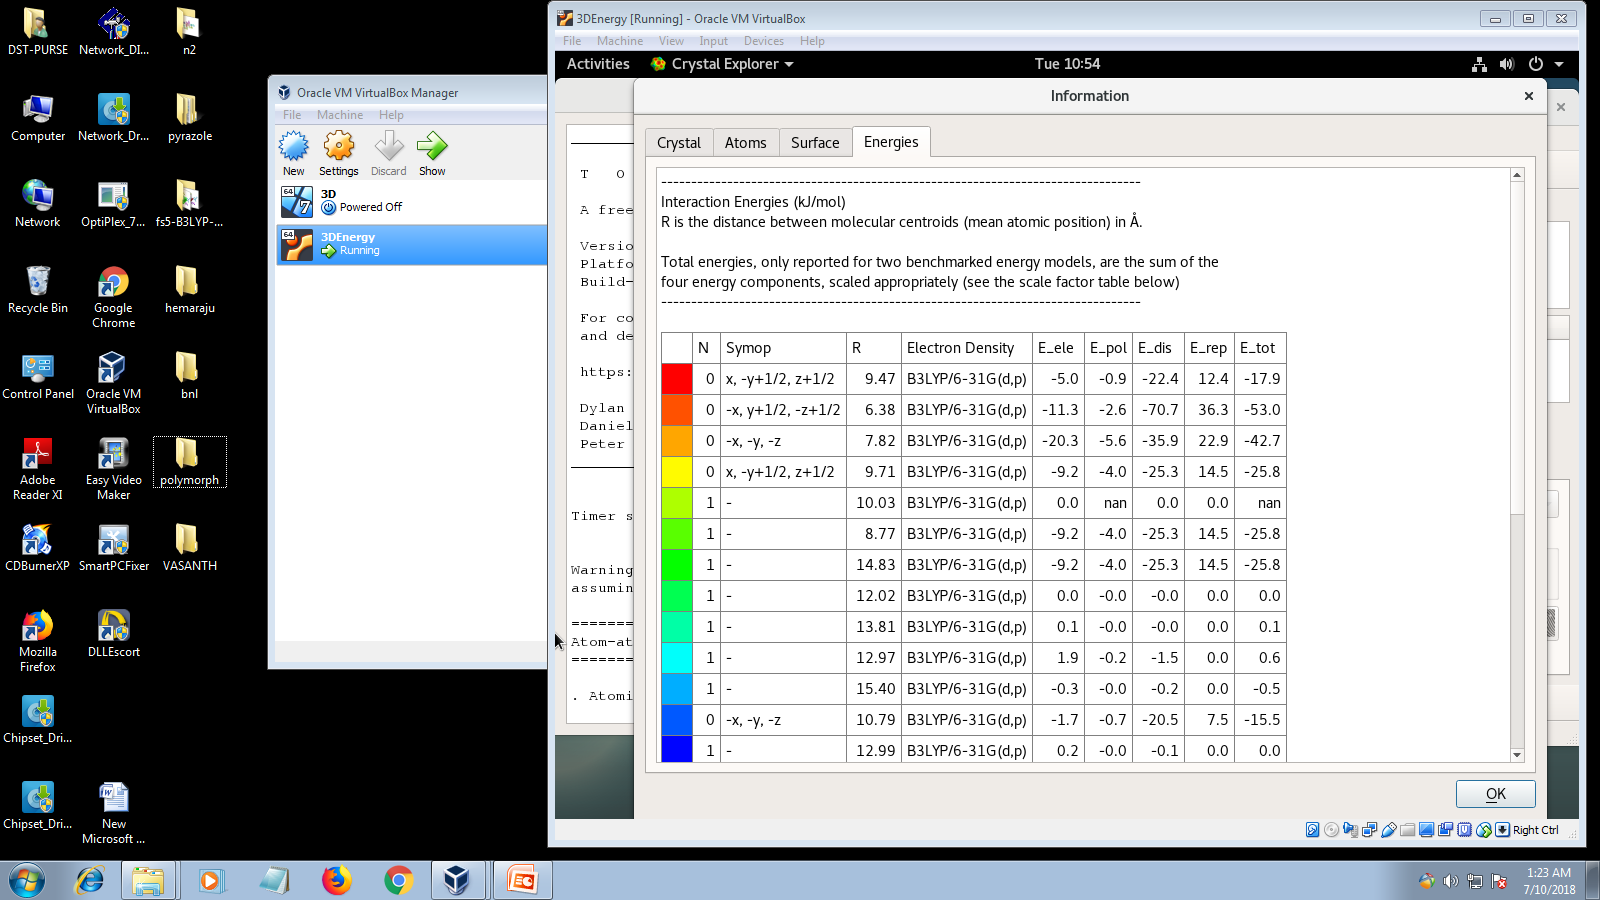


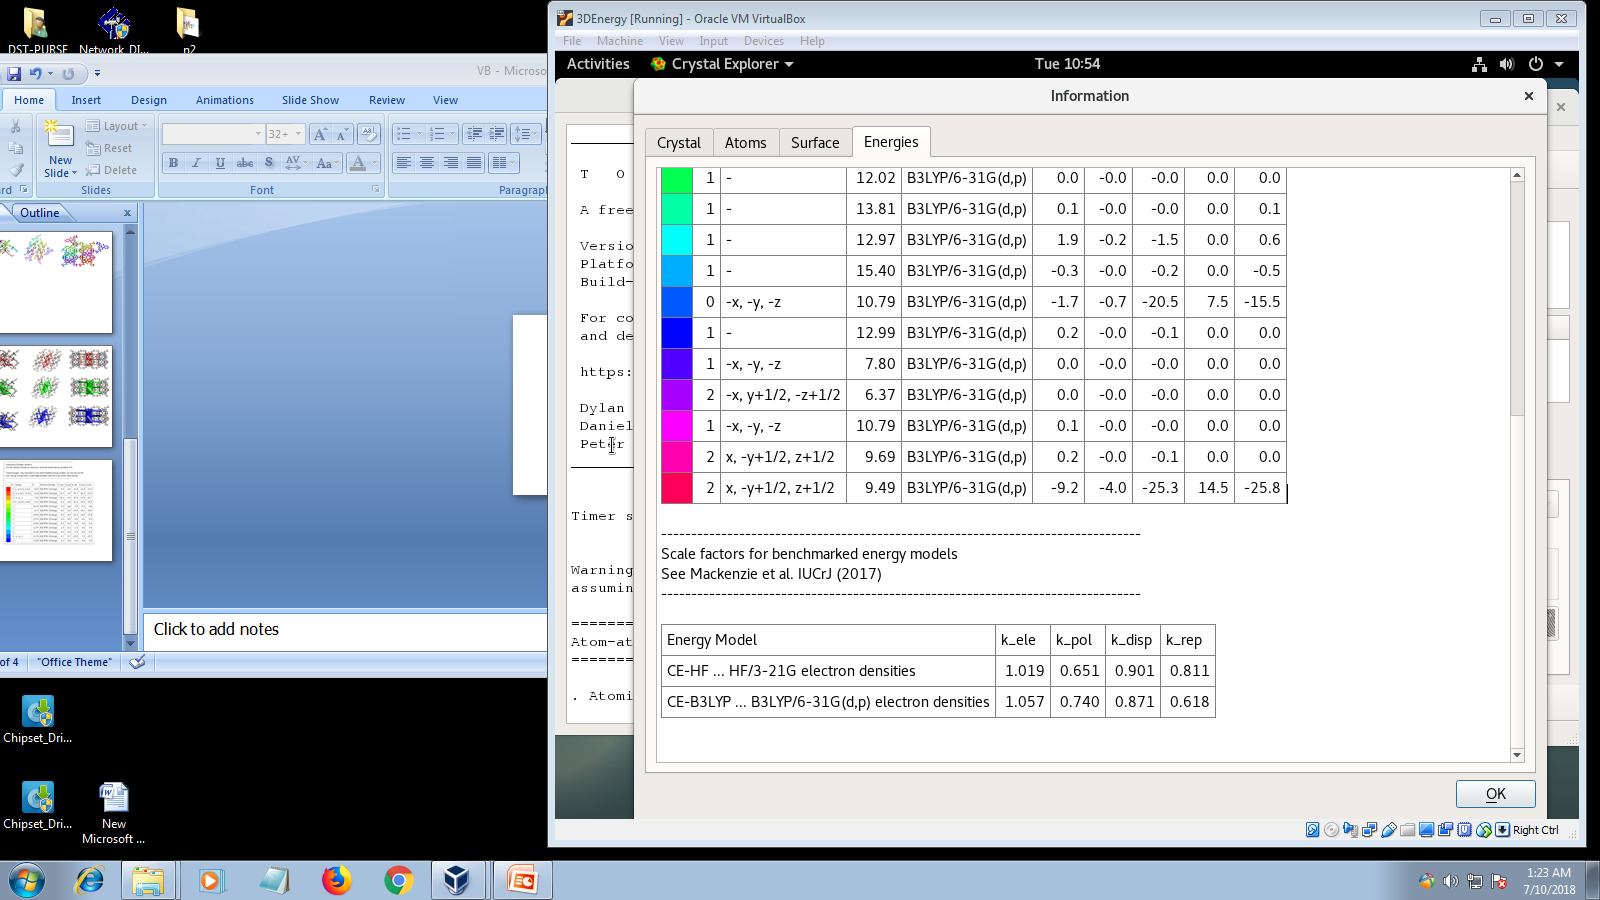


**(a)**

|  | **Eele** | **Epol** | **Edis** | **Erepl** | **Etot** | **Average Etot (kJ/mole)** |
| --- | --- | --- | --- | --- | --- | --- |
| **BI** | **--64.5** | **-27.9** | **-274.9** | **144.6** | **-247.4** | **-123.7** |

**(b)**


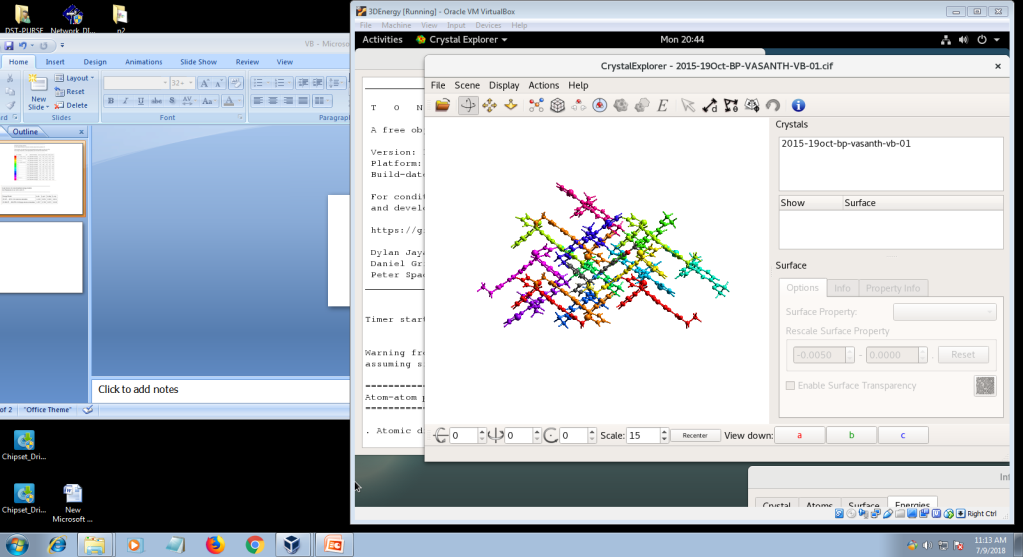

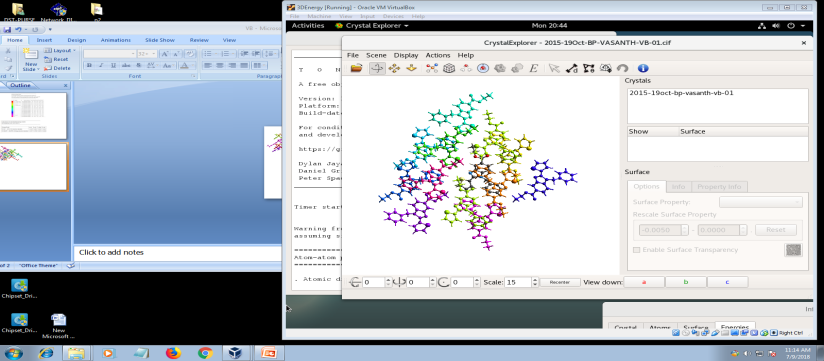

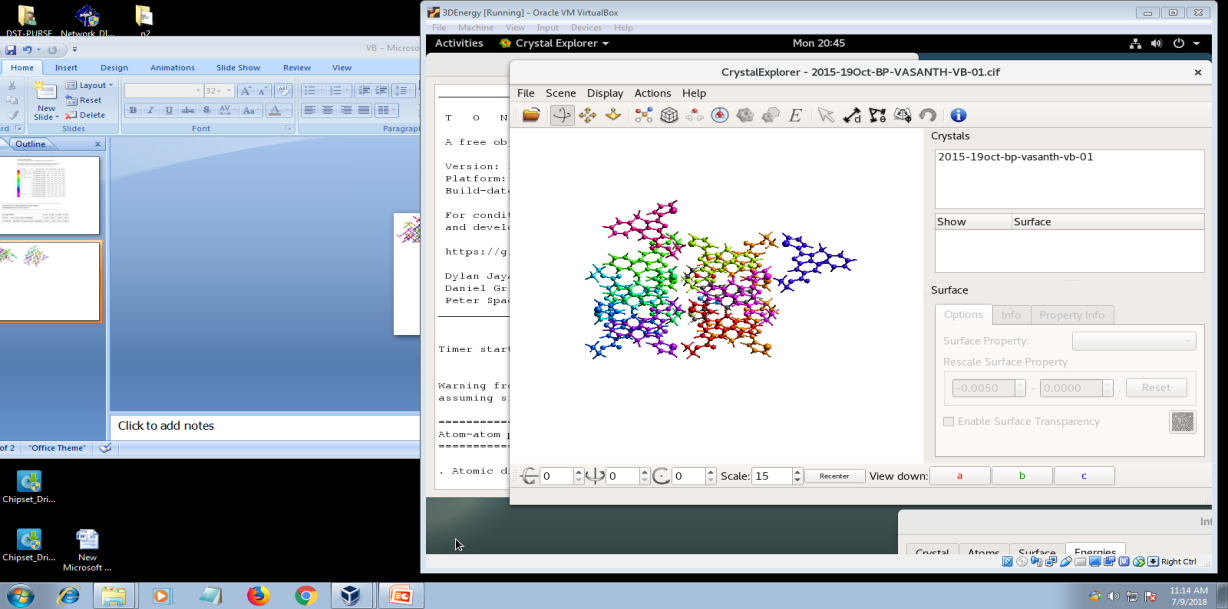


**Molecule A**


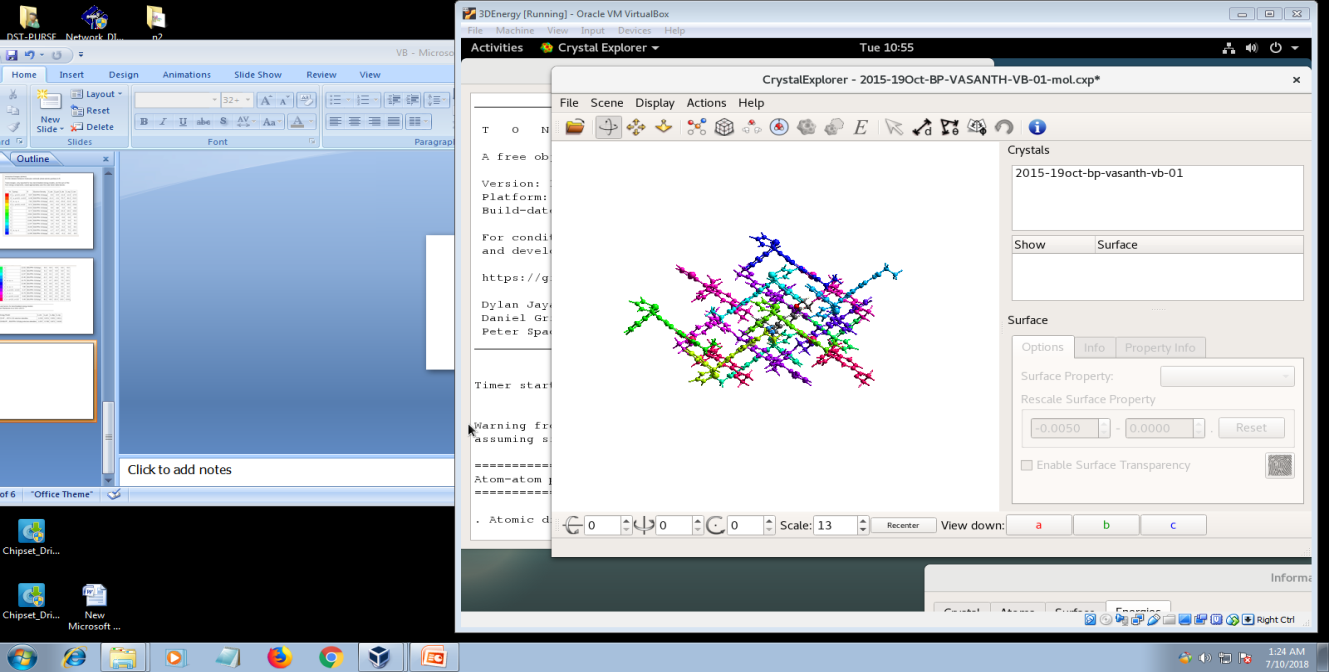

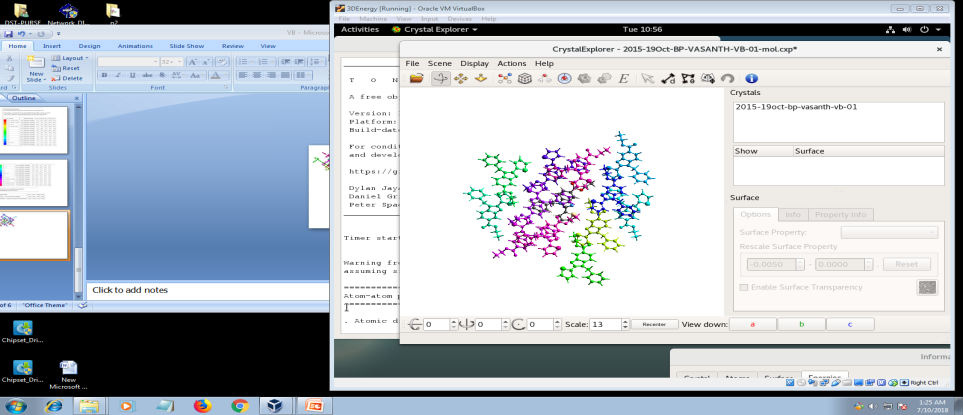

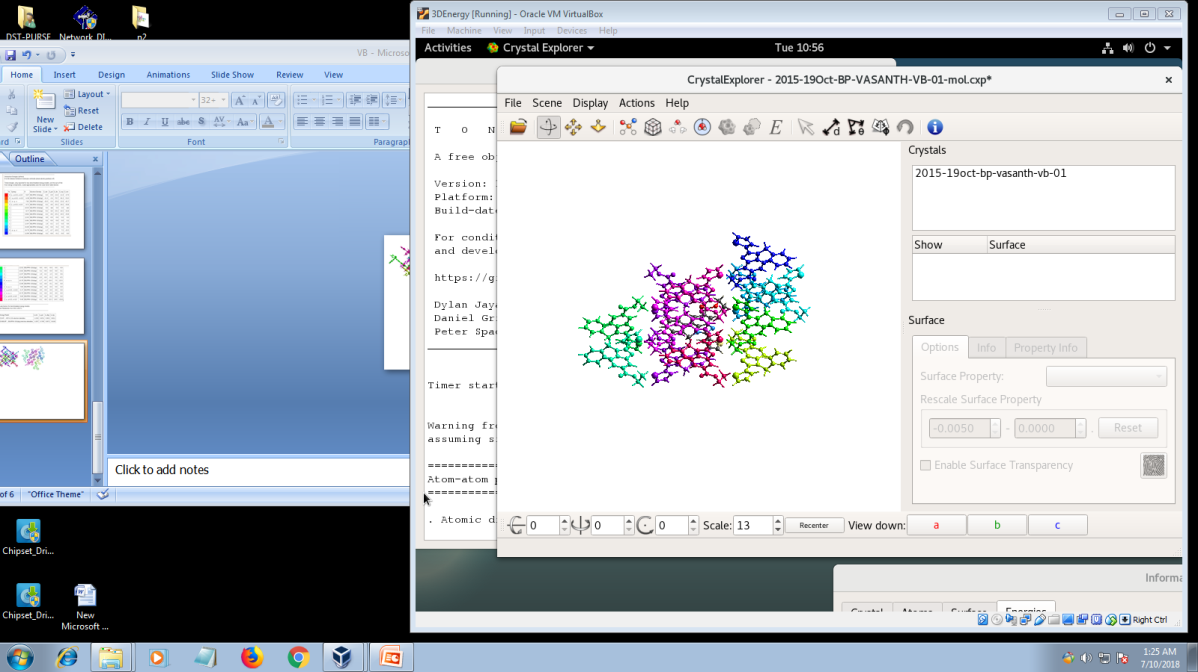


**Molecule B**

**Figure S3:** Color coding of neighbouring molecules with respect to the central molecule (gray) of the **BI**. A view along *a*,*b*,*c*-axis**.**

**Figure S4: Geometrical parameters comparison of theoretical and experimental geometry.**

**
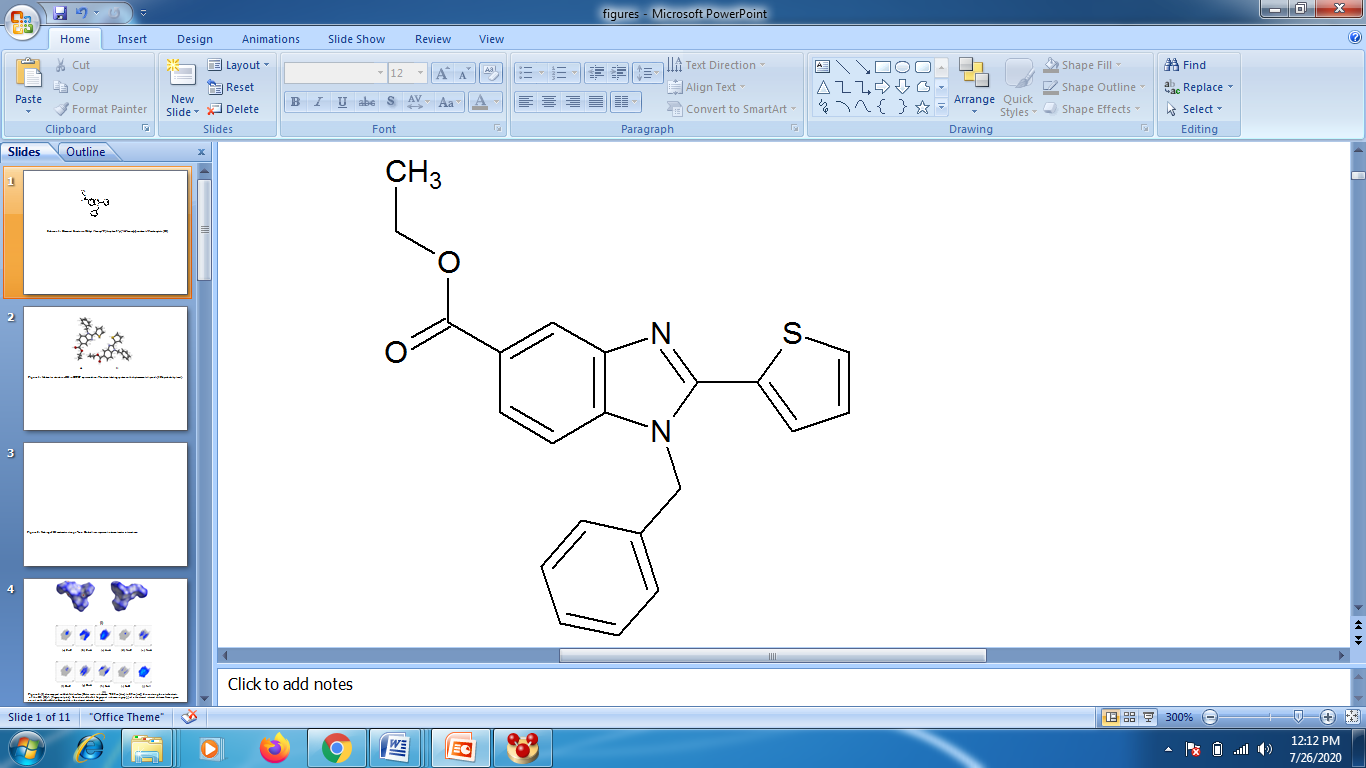
**

**Figure S5: BI molecule backbone used for CSD search and structural comparison.**

**Table S7. Bond length**

| Bond length | A mol (Xray) | B3LYP/6-311++G(d,p) |
| --- | --- | --- |
| S1A C1A | 1.740(5) | 1.728 |
| S1A C4A | 1.656(4) | 1.748 |
| O1A C19A | 1.335(4) | 1.352 |
| O1A C20A | 1.451(5) | 1.449 |
| O2A C19A | 1.192(4) | 1.213 |
| N1A C5A | 1.384(4) | 1.396 |
| N1A C6A | 1.466(4) | 1.454 |
| N1A C13A | 1.382(4) | 1.381 |
| N2A C5A | 1.310(4) | 1.316 |
| N2A C18A | 1.382(4) | 1.380 |
| C1A C2A | 1.336(7) | 1.368 |
| C2A C3A | 1.355(6) | 1.421 |
| C3A C4A | 1.410(5) | 1.378 |
| C4A C5A | 1.462(5) | 1.452 |
| C6A C12A | 1.508(5) | 1.520 |
| C7A C8A | 1.381(5) | 1.395 |
| C7A C12A | 1.382(5) | 1.395 |
| C8A C9A | 1.355(7) | 1.393 |
| C9A C10A | 1.377(7) | 1.396 |
| C10A C11A | 1.376(6) | 1.392 |
| C11A C12A | 1.382(5) | 1.399 |
| C13A C14A | 1.381(4) | 1.396 |
| C13A C18A | 1.402(4) | 1.414 |
| C14A C15A | 1.385(5) | 1.386 |
| C15A C16A | 1.404(4) | 1.414 |
| C16A C17A | 1.373(5) | 1.396 |
| C16A C19A | 1.488(5) | 1.488 |
| C17A C18A | 1.389(4) | 1.395 |
| C20A C21A | 1.455(8) | 1.520 |

**Table S8. Bond angle**

| Angle | A mol  (Xray) | B3LYP/6-311++G(d,p) |
| --- | --- | --- |
| C4A S1A C1A | 92.9(2) | 91.3 |
| C19A O1A C20A | 117.9(3) | 117.0 |
| C5A N1A C6A | 130.7(3) | 128.6 |
| C13A N1A C5A | 106.1(3) | 106.3 |
| C13A N1A C6A | 122.7(3) | 125.0 |
| C5A N2A C18A | 105.3(3) | 105.7 |
| C2A C1A S1A | 110.2(3) | 112.1 |
| C1A C2A C3A | 113.4(4) | 112.7 |
| C2A C3A C4A | 114.1(4) | 113.0 |
| C3A C4A S1A | 109.3(3) | 110.9 |
| C3A C4A C5A | 131.1(3) | 130.5 |
| C5A C4A S1A | 119.5(3) | 118.6 |
| N1A C5A C4A | 123.7(3) | 123.8 |
| N2A C5A N1A | 113.0(3) | 112.5 |
| N2A C5A C4A | 123.3(3) | 123.7 |
| N1A C6A C12A | 113.7(3) | 114.7 |
| C8A C7A C12A | 120.3(4) | 120.3 |
| C9A C8A C7A | 120.8(4) | 120.3 |
| C8A C9A C10A | 119.5(4) | 119.6 |
| C11A C10A C9A | 120.4(4) | 120.0 |
| C10A C11A C12A | 120.5(4) | 120.6 |
| C7A C12A C6A | 122.6(3) | 121.9 |
| C7A C12A C11A | 118.6(3) | 119.2 |
| C11A C12A C6A | 118.8(3) | 118.9 |
| N1A C13A C18A | 105.5(3) | 105.5 |
| C14A C13A N1A | 131.4(3) | 132.1 |
| C14A C13A C18A | 123.1(3) | 122.4 |
| C13A C14A C15A | 116.1(3) | 116.8 |
| C14A C15A C16A | 122.0(3) | 121.6 |
| C15A C16A C19A | 117.2(3) | 117.3 |
| C17A C16A C15A | 120.8(3) | 121.1 |
| C17A C16A C19A | 122.0(3) | 121.7 |
| C16A C17A C18A | 118.6(3) | 118.0 |
| N2A C18A C13A | 110.1(3) | 110.0 |
| N2A C18A C17A | 130.4(3) | 129.9 |
| C17A C18A C13A | 119.5(3) | 120.1 |
| O1A C19A C16A | 111.4(3) | 112.4 |
| O2A C19A O1A | 124.4(3) | 123.1 |
| O2A C19A C16A | 124.1(4) | 124.4 |
| O1A C20A C21A | 110.4(5) | 111.4 |

**Table S9.Torsion angle**

| Torsion | A mol  (Xray) | B3LYP/6-311++G(d,p) |
| --- | --- | --- |
| S1A C1A C2A C3A | -1.4(6) | -0.4 |
| S1A C4A C5A N1A | -152.8(3) | -152.3 |
| S1A C4A C5A N2A | 27.2(5) | 26.5 |
| N1A C6A C12A C7A | 43.2(5) | -14.6 |
| N1A C6A C12A C11A | -139.3(3) | 165.6 |
| N1A C13A C14A C15A | 178.4(3) | 179.8 |
| N1A C13A C18A N2A | 0.0(4) | 0.7 |
| N1A C13A C18A C17A | -179.1(3) | -179.8 |
| C1A S1A C4A C3A | -1.3(3) | -0.6 |
| C1A S1A C4A C5A | -178.8(3) | -178.6 |
| C1A C2A C3A C4A | 0.5(6) | -0.1 |
| C2A C3A C4A S1A | 0.8(4) | 0.5 |
| C2A C3A C4A C5A | 177.9(4) | 178.1 |
| C3A C4A C5A N1A | 30.3(6) | 30.2 |
| C3A C4A C5A N2A | -149.6(4) | -150.9 |
| C4A S1A C1A C2A | 1.6(4) | 0.6 |
| C5A N1A C6A C12A | -109.0(4) | -91.5 |
| C5A N1A C13A C14A | -178.0(3) | 178.8 |
| C5A N1A C13A C18A | 0.2(3) | -1.0 |
| C5A N2A C18A C13A | -0.3(4) | -0.0 |
| C5A N2A C18A C17A | 178.7(3) | -179.5 |
| C6A N1A C5A N2A | -172.4(3) | -174.9 |
| C6A N1A C5A C4A | 7.7(5) | 4.1 |
| C6A N1A C13A C14A | -5.3(5) | -5.1 |
| C6A N1A C13A C18A | 173.0(3) | 175.1 |
| C7A C8A C9A C10A | 0.4(7) | -0.1 |
| C8A C7A C12A C6A | 177.0(3) | -179.7 |
| C8A C7A C12A C11A | -0.4(5) | 0.0 |
| C8A C9A C10A C11A | 0.1(7) | 0.0 |
| C9A C10A C11A C12A | -0.8(7) | 0.2 |
| C10A C11A C12A C6A | -176.6(4) | 179.6 |
| C10A C11A C12A C7A | 0.9(6) | -0.2 |
| C12A C7A C8A C9A | -0.2(6) | 0.1 |
| C13A N1A C5A N2A | -0.5(4) | 1.1 |
| C13A N1A C5A C4A | 179.6(3) | -180.0 |
| C13A N1A C6A C12A | 80.2(4) | 93.2 |
| C13A C14A C15A C16A | -0.3(5) | 0.2 |
| C14A C13A C18A N2A | 178.5(3) | -179.1 |
| C14A C13A C18A C17A | -0.7(5) | 0.4 |
| C14A C15A C16A C17A | 0.4(5) | 0.1 |
| C14A C15A C16A C19A | -177.2(3) | 179.9 |
| C15A C16A C17A C18A | -0.7(5) | -0.2 |
| C15A C16A C19A O1A | -175.2(3) | 180.0 |
| C15A C16A C19A O2A | 7.0(6) | -0.1 |
| C16A C17A C18A N2A | -178.2(3) | 179.3 |
| C16A C17A C18A C13A | 0.8(5) | 0.0 |
| C17A C16A C19A O1A | 7.2(5) | -0.1 |
| C17A C16A C19A O2A | -170.5(4) | 179.8 |
| C18A N2A C5A N1A | 0.5(4) | -0.6 |
| C18A N2A C5A C4A | -179.6(3) | -179.6 |
| C18A C13A C14A C15A | 0.4(5) | -0.5 |
| C19A O1A C20A C21A | 96.2(5) | 81.5 |
| C19A C16A C17A C18A | 176.8(3) | 180.0 |
| C20A O1A C19A O2A | 0.7(7) | 0.9 |
| C20A O1A C19A C16A | -177.1(4) | -179.2 |
